# Supplementary material for: Succulent-plant-like Ni–Co alloy efficient catalysts for direct borohydride fuel cells
Source: Royal Society of Chemistry journal article supplement (doi:10.1039/d2dt03656h), 2023-01-01
Supplement: d2dt03656h2.pdf [file d2dt03656h2.pdf]

**Electronic supplementary information for**  
**Succulent-plant-like Ni-Co alloy efficient catalysts for direct**  
**borohydride fuel cells**

*Jinliang Cai<sup>a</sup>, Peng Chen<sup>a</sup>, Bihao Hu<sup>a</sup>, Chuanlan Xu<sup>a</sup>, Ying Yang<sup>a</sup>, Jiazhi Meng<sup>a</sup>,*

*Biao Zhang<sup>a</sup>, Danmei Yu<sup>\*,a</sup>, Xiaoyuan Zhou<sup>\*,b</sup>, and Changguo Chen<sup>a</sup>*

<sup>a</sup> School of Chemistry and Chemical Engineering, Chongqing University, Chongqing,  
401331, P.R. China

<sup>b</sup> College of Physics, Chongqing University, Chongqing, 401331, P.R. China

**Corresponding Authors**

**\*Danmei Yu's** e-mail: yudanmei-1@163.com.

**\*Xiaoyuan Zhou's** e-mail: xiaoyuan2013@cqu.edu.cn.

**Notes**

The authors declare no competing financial interest.

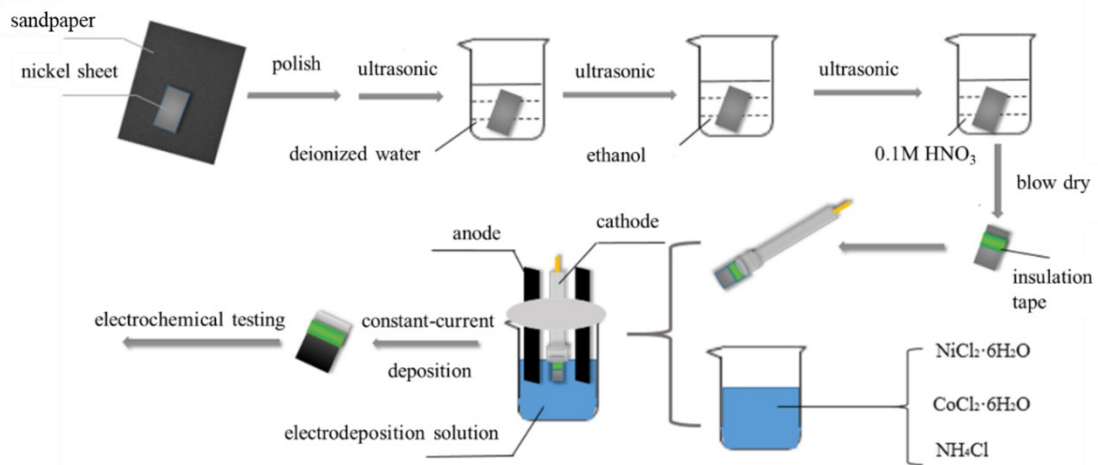

**Figure S1.** Schematic diagram of catalyst preparation process

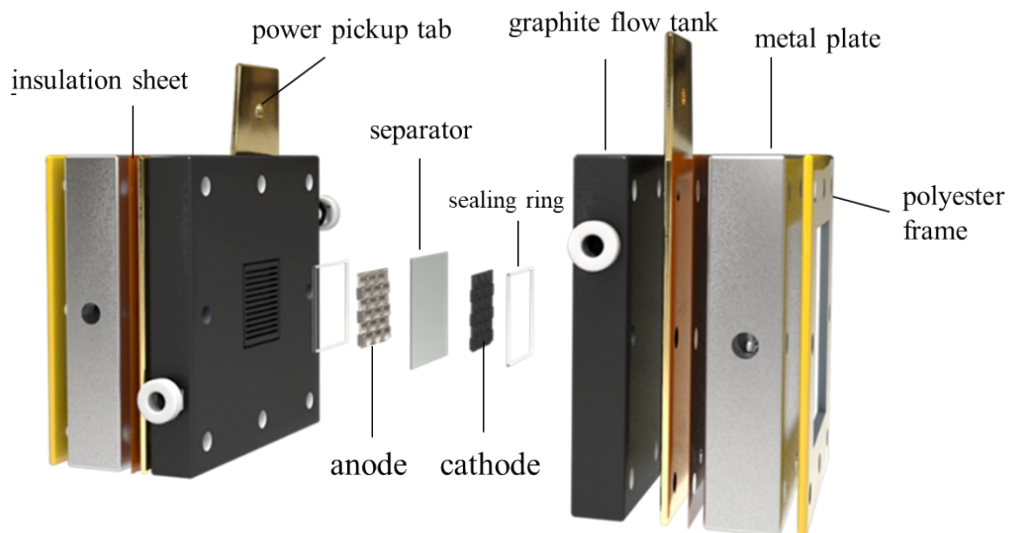

**Figure S2.** The structure diagram of the DBFC device.

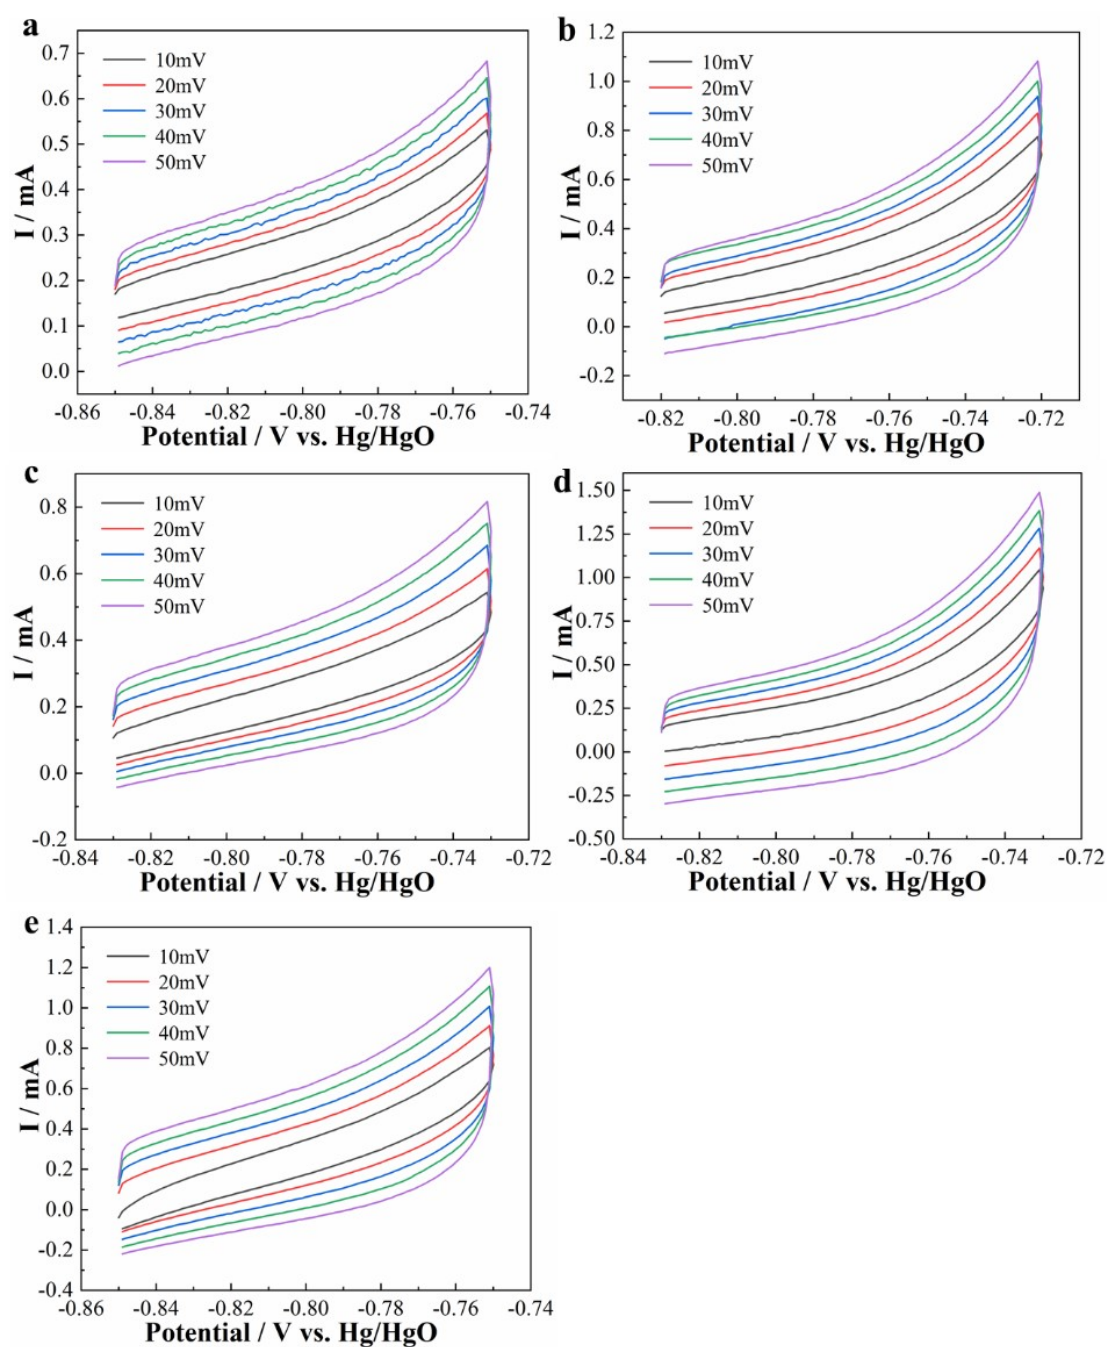

**Figure S3.** The CV curves on (a) Ni, (b) Ni<sub>0.935</sub>-Co<sub>0.065</sub>, (c) Ni<sub>0.909</sub>-Co<sub>0.091</sub>, (d) Ni<sub>0.889</sub>-Co<sub>0.111</sub>, and (e) Ni<sub>0.87</sub>-Co<sub>0.13</sub> catalysts in 1 M KOH solution.

Calculation of Electrochemical Active Surface Area (ECSA) by CV test using the double-layer capacitance method. The CV test was performed in 1 M KOH solution in the range of  $\pm 0.5$  V open circuit potential and the results are shown in Figure S3. According to the CV curves in Figure S3, the ECSA of the prepared catalyst can be calculated by equations 1 and 2

$$i_c = vC_{DL} \quad (1)$$

$$ECSA = C_{DL}/C_S \quad (2)$$

Where  $C_s$  represents the theoretical specific capacitance of Ni catalyst in alkaline electrolyte, which is  $40 \mu\text{F cm}^{-2}$ . Moreover, all calculation results can be found in Table S1.

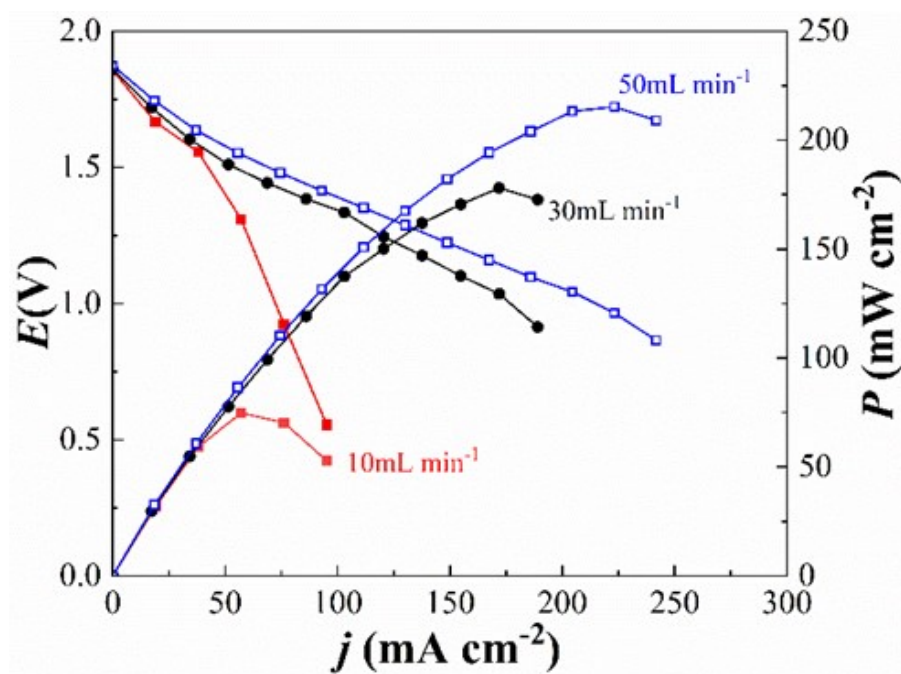

**Figure S4.** Performance of a DBFC using  $\text{Ni}_{0.889}\text{-Co}_{0.111}$  anode under different flowrate

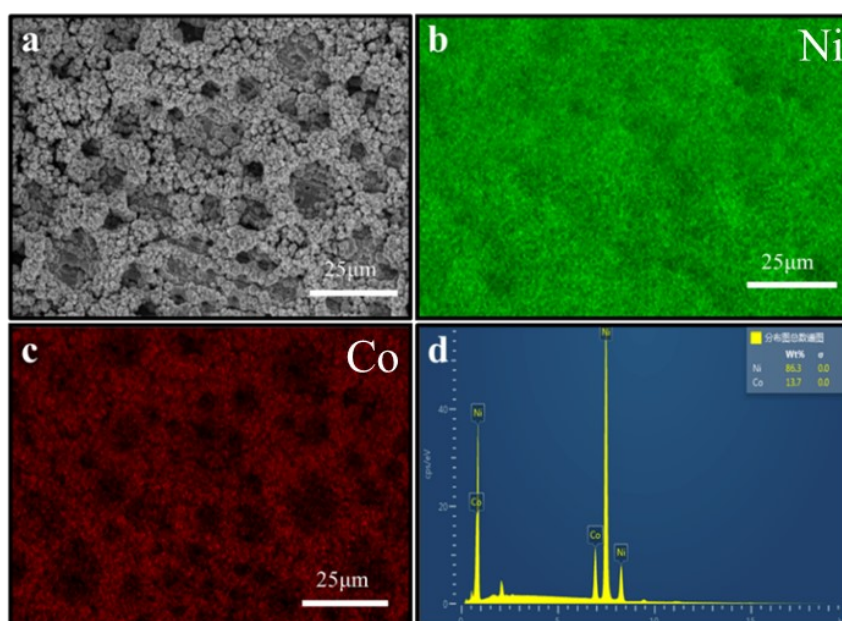

**Figure S5.** (a) SEM images of  $\text{Ni}_{0.889}\text{-Co}_{0.111}$ , (b-c) Ni and Co elemental distribution of  $\text{Ni}_{0.889}\text{-Co}_{0.111}$ , (d) EDS spectra of  $\text{Ni}_{0.889}\text{-Co}_{0.111}$

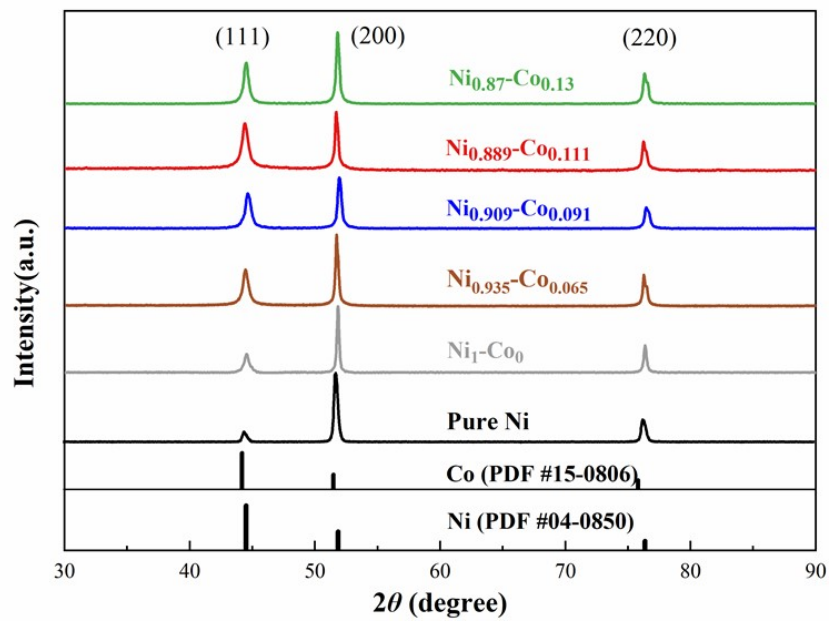

Figure S6. XRD patterns of prepared catalysts.

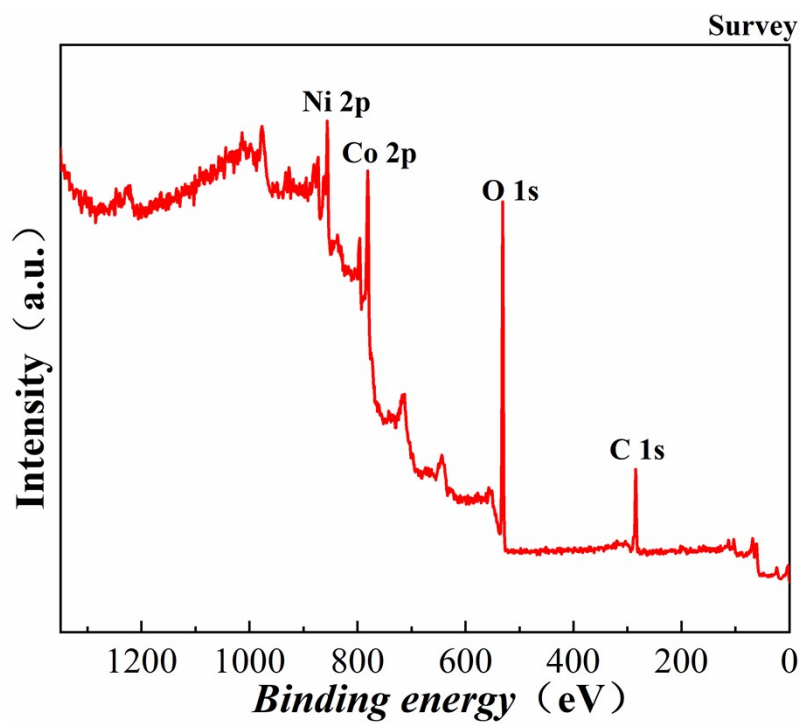

Figure S7. XPS spectra of survey for  $\text{Ni}_{0.889}\text{-Co}_{0.111}$  catalyst

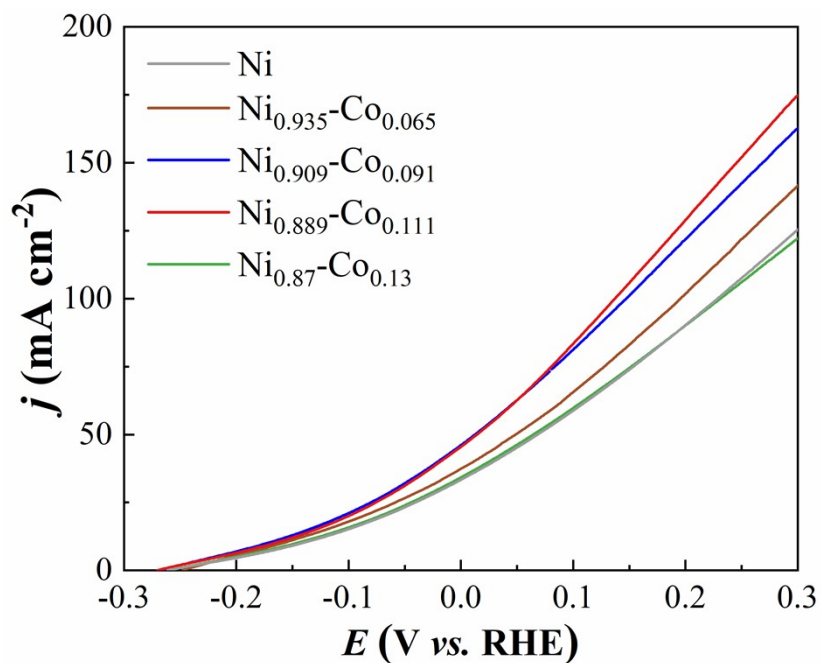

**Figure S8.** LSV curves of BOR on Ni<sub>x</sub>-Co<sub>y</sub> catalysts in the mixed solution of 0.135 mol L<sup>-1</sup> NaBH<sub>4</sub> and 2 mol L<sup>-1</sup> NaOH at scan rate of 10 mV s<sup>-1</sup> and 298 K

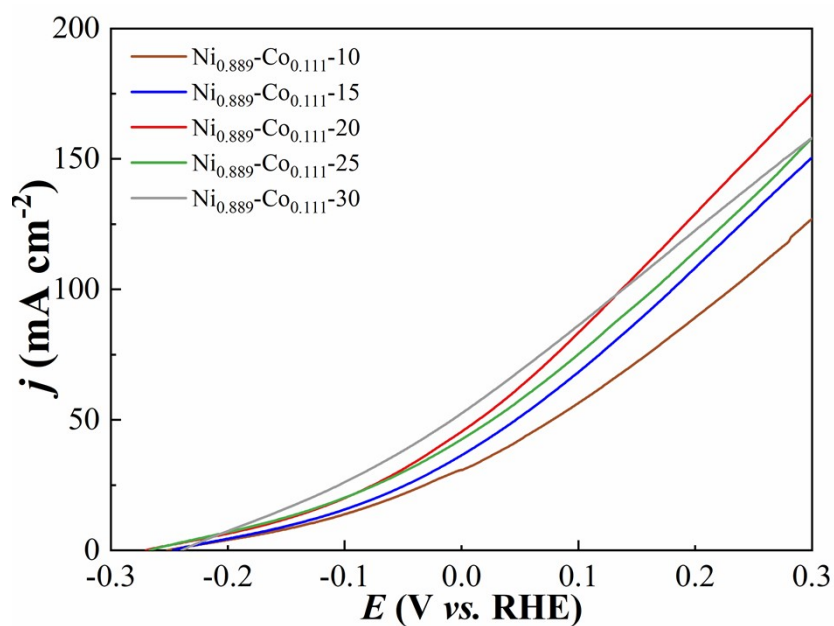

**Figure S9.** LSV curves of BOR on Ni<sub>x</sub>-Co<sub>y</sub> catalysts in the mixed solution of 0.135 mol L<sup>-1</sup> NaBH<sub>4</sub> and 2 mol L<sup>-1</sup> NaOH at scan rate of 10 mV s<sup>-1</sup> and 298 K

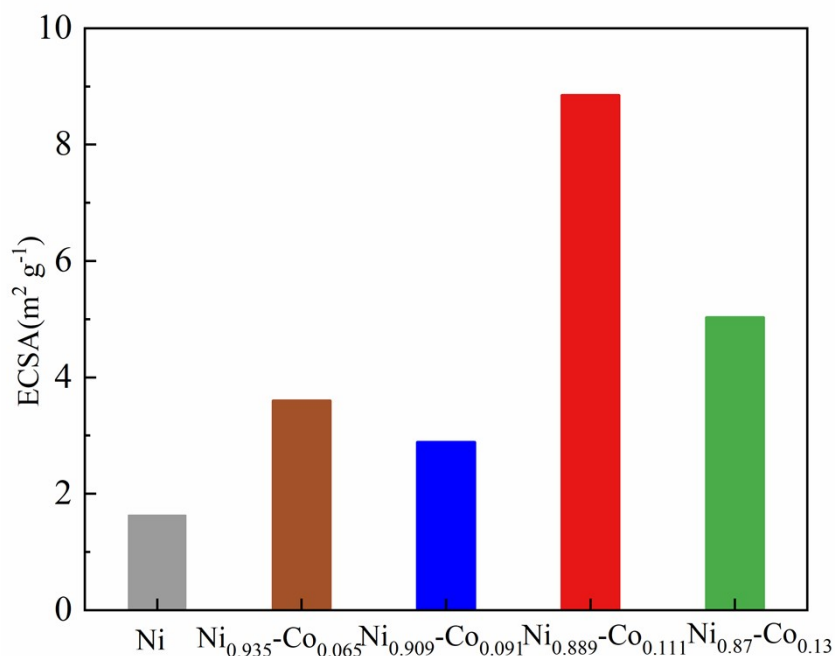

**Figure S10.** ECSA of different catalysts

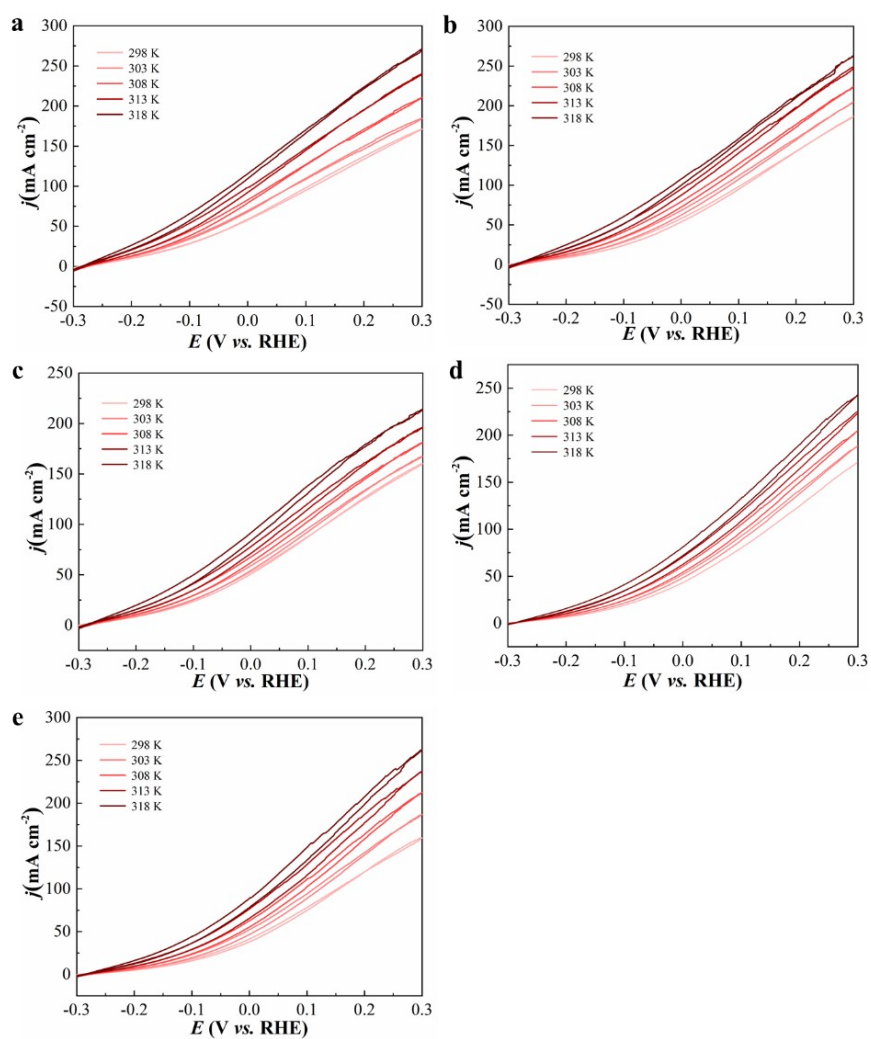

**Figure S11.** CV curves of BOR on (a) Ni<sub>0.935</sub>-Co<sub>0.065</sub>, (b) Ni<sub>0.909</sub>-Co<sub>0.091</sub>, (c) Ni<sub>0.889</sub>-Co<sub>0.111</sub>, (d) Ni<sub>0.87</sub>-Co<sub>0.13</sub> and (e) Ni catalyst at different temperatures in the mixed solution of 0.135 mol L<sup>-1</sup> NaBH<sub>4</sub> and 2 mol L<sup>-1</sup> NaOH

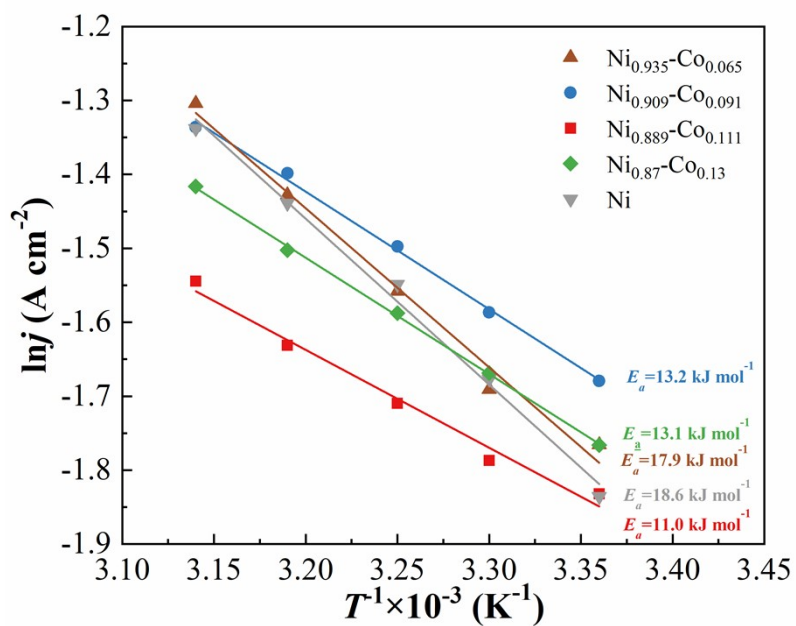

**Figure S12.** Arrhenius plots of BOR on different catalysts at 0.3 V vs. RHE under scan rate of 10  $\text{mV s}^{-1}$

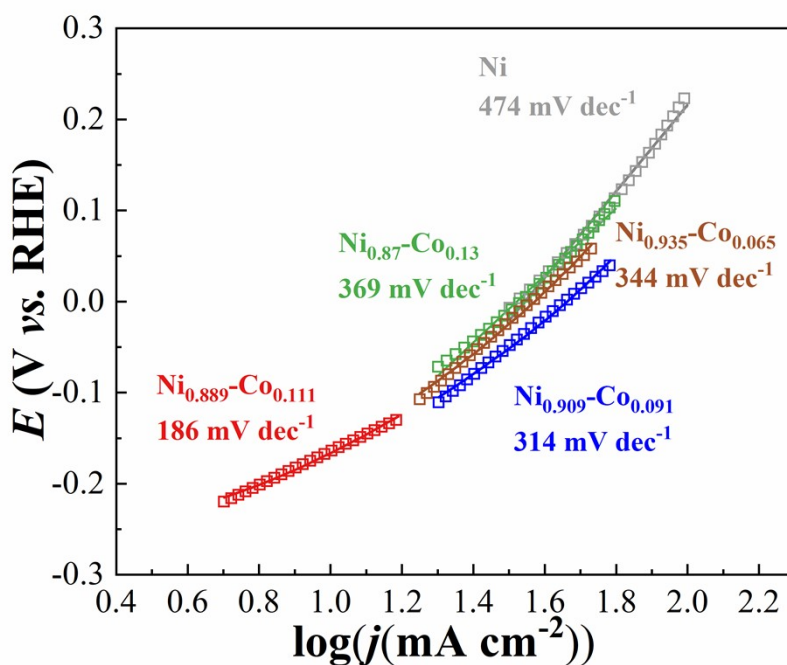

**Figure S13.** The corresponding Tafel slopes fitted based on the results in Figure S8



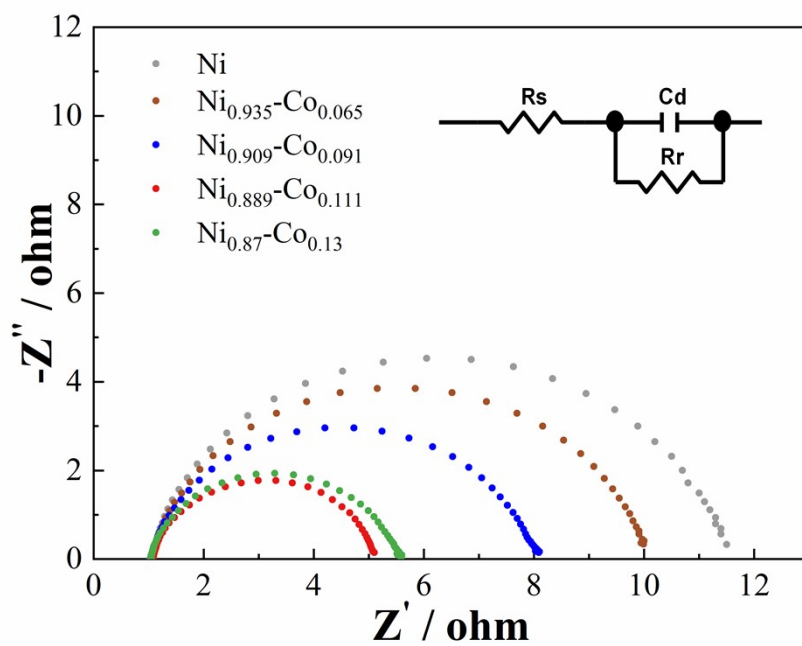

Figure S14. Nyquist plots of the Ni<sub>x</sub>-Co<sub>y</sub> catalysts

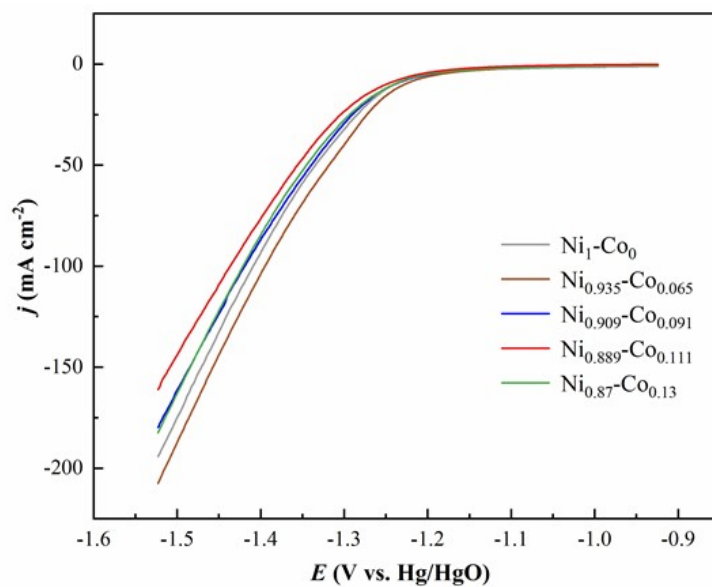

Figure S15. LSV curves of HER on Ni-Co catalyst

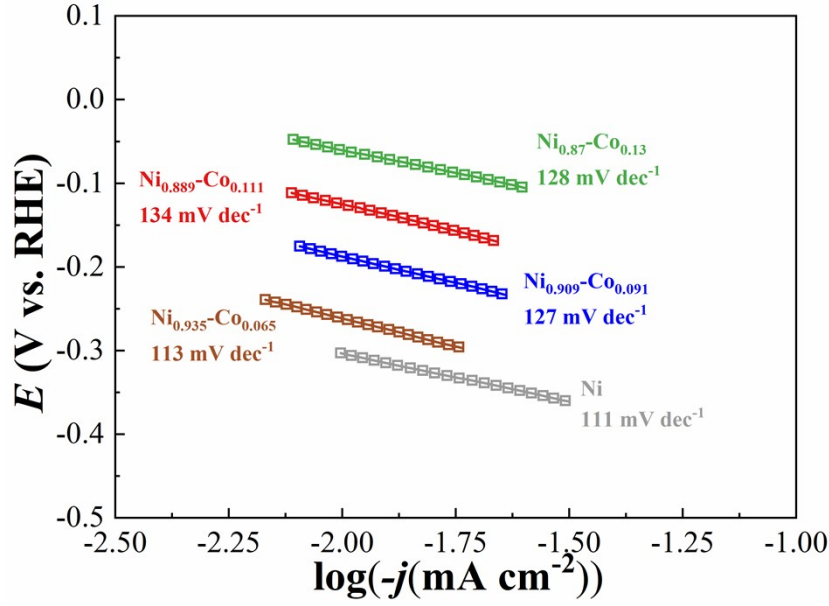

**Figure S16.** The corresponding Tafel slopes fitted based on the results in Figure S14

### Measurement of the transfer electron number

The prepared catalyst was cut into a size of about 3 mm × 3 mm and fixed on the surface of a rotating disc electrode (RDE). CV was done in a conventional three-electrode system using RDE as WE, carbon rod as CE, Hg/HgO electrode as RE, and a mixed solution of 5 mM NaBH<sub>4</sub> and 1 M NaOH as electrolyte at different disc speeds (200, 400, 600, 800, and 1000 rpm) and a potential scan rate of 20 mV s<sup>-1</sup>. The transfer electron number was calculated according to the Koutecky-Levich equation follow as:

$$j^{-1} = j_k^{-1} + j_d^{-1} = j_k^{-1} + B^{-1}\omega^{-0.5}$$

(3)

In the formula,  $j_k^{-1}$  is the dynamic current density, and  $j_d^{-1}$  is the diffusion-limited current density,  $\omega$  is the rotational speed of RDE.  $B$  can be calculated according to Levich equation (4).

$$B = 0.62nD^{2/3}F\nu^{-1/6}c_0 \quad (4)$$

Here,  $n$  is the transfer electron number,  $D$  is the diffusion coefficient of BH<sub>4</sub><sup>-</sup> ( $2.6 \times 10^{-5}$  cm<sup>2</sup> s<sup>-1</sup>),  $F$  is the Faraday constant (96485 C mol<sup>-1</sup>),  $\nu$  is the kinematic viscosity of the electrolyte (0.0118 cm<sup>2</sup> s<sup>-1</sup>), and  $c_0$  is the concentration of NaBH<sub>4</sub> (5 mM).

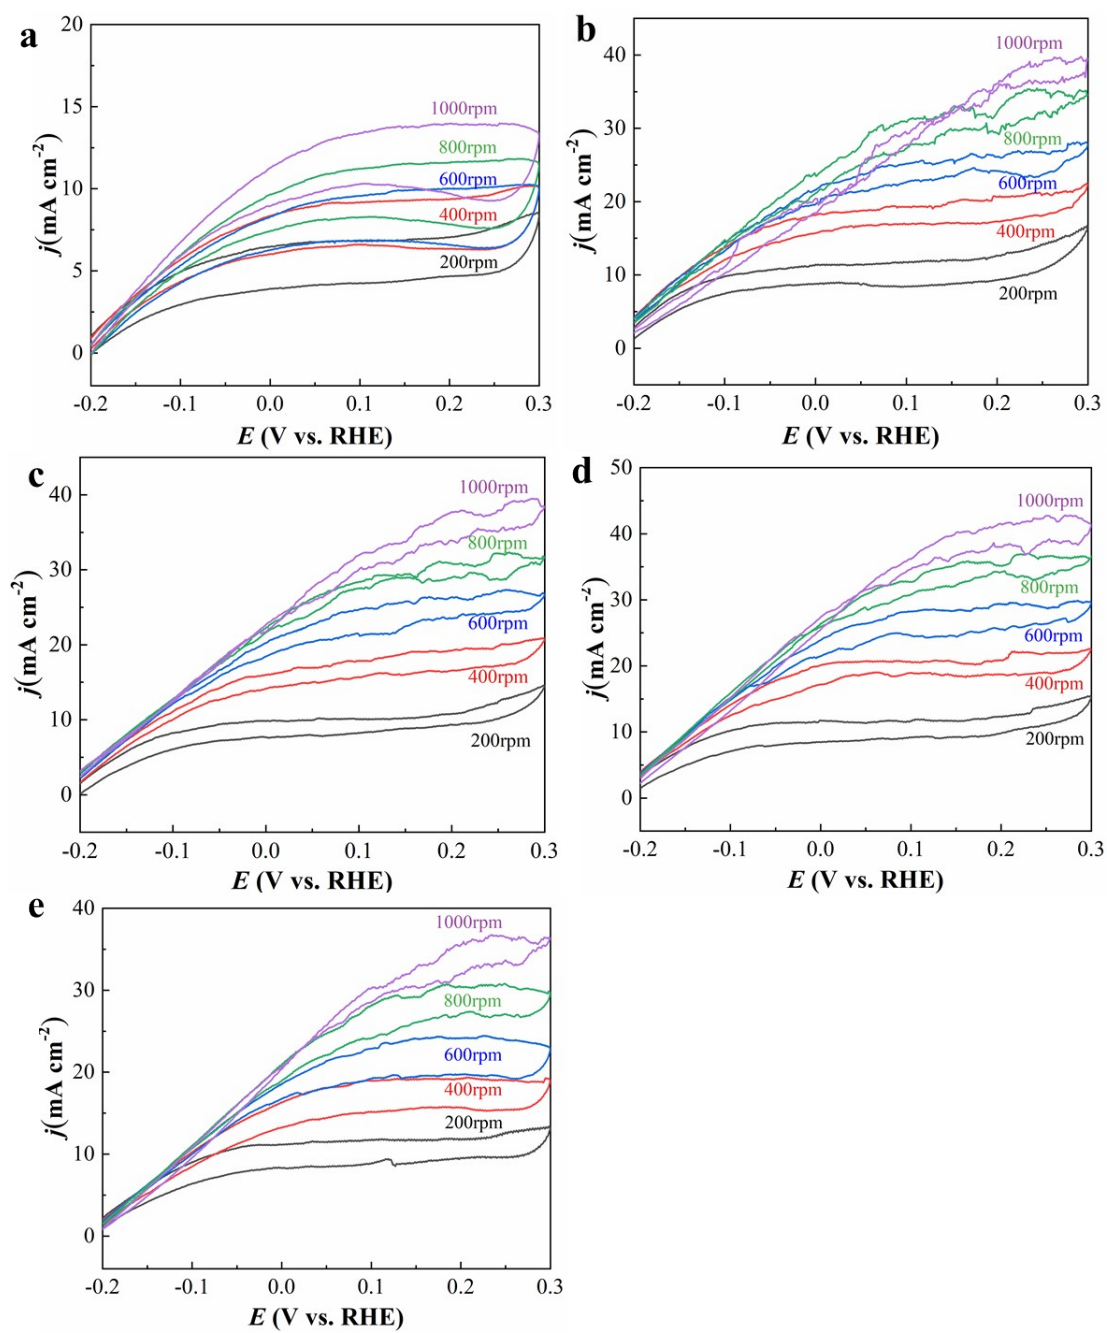

**Figure S17.** CV curves of BOR on (a) Ni, (b) Ni<sub>0.935</sub>-Co<sub>0.065</sub>, (c) Ni<sub>0.909</sub>-Co<sub>0.091</sub>, (d) Ni<sub>0.889</sub>-Co<sub>0.111</sub>, and (e) Ni<sub>0.87</sub>-Co<sub>0.13</sub> catalysts at different speeds (the five curves in each picture from top to bottom correspond to 1000, 800, 600, 400, 200rpm)

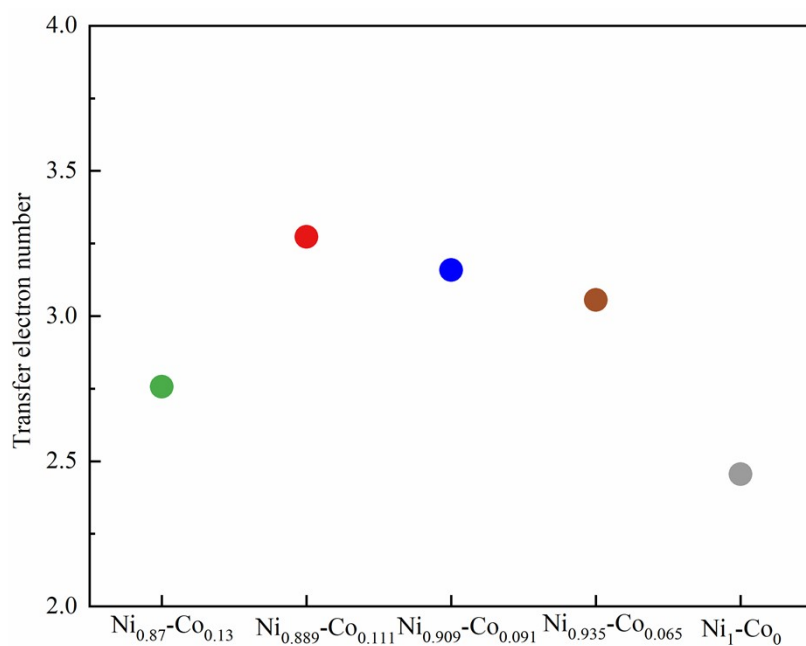

**Figure S18.** Transfer electron number of BOR on different catalysts

**Table S1.** Summary of electrochemical performances on prepared catalysts.

| Catalyst                                 | Loading quality /mg | ECSA /m <sup>2</sup> g <sup>-1</sup> | Activation energy of BOR /kJ mol <sup>-1</sup> | BOR <i>j</i> /mA cm <sup>-2</sup> | BOR Tafel slope /mV dac <sup>-1</sup> | HER Tafel slope /mV dac <sup>-1</sup> | Electron transfer number | $\eta$ /% |
|------------------------------------------|---------------------|--------------------------------------|------------------------------------------------|-----------------------------------|---------------------------------------|---------------------------------------|--------------------------|-----------|
| Ni                                       | 6                   | 1.6343                               | 18.65                                          | 125.4                             | 473.8                                 | 111.0                                 | 2.45                     | 61.1      |
| Ni <sub>0.935</sub> -Co <sub>0.065</sub> | 6                   | 3.6                                  | 17.89                                          | 141.6                             | 344.1                                 | 113.3                                 | 3.06                     | 83.8      |
| Ni <sub>0.909</sub> -Co <sub>0.091</sub> | 4                   | 2.8875                               | 13.22                                          | 162.7                             | 314.0                                 | 126.6                                 | 3.16                     | 81.3      |
| Ni <sub>0.889</sub> -Co <sub>0.111</sub> | 6                   | 8.85                                 | 11.00                                          | 174.8                             | 186.1                                 | 134.1                                 | 3.27                     | 85.1      |
| Ni <sub>0.87</sub> -Co <sub>0.13</sub>   | 8                   | 5.0333                               | 13.08                                          | 122.1                             | 368.8                                 | 127.9                                 | 2.76                     | 79.7      |

**Table S2.** Operating conditions of DBFC with different anode catalysts. Symbols:  $T$  is the operating temperature, OCV is the open circuit voltage,  $P$  is the power density.

| Ref.      | Anode                                        | Cathode | Separator                  | Anolyte                                 | Catholyte                                                                     | $T(K)$ | OCV(V) | $P(mW\ cm^{-2})$ |
|-----------|----------------------------------------------|---------|----------------------------|-----------------------------------------|-------------------------------------------------------------------------------|--------|--------|------------------|
| [4]       | <u>NiMoN@NC</u>                              | FeN-HPC | non                        | 1.0 M NaBH <sub>4</sub> +<br>3.0 M NaOH | O <sub>2</sub>                                                                | 333    | 2.0    | 112              |
| [36]      | <u>Pd-Ni/N-rGO</u>                           | Pt/C    | <u>Nafion 117</u>          | 1.0 M NaBH <sub>4</sub> +<br>2.0 M NaOH | 2 M H <sub>2</sub> O <sub>2</sub> +0.5 M<br>H <sub>2</sub> SO <sub>4</sub>    | 333    | 2.0    | 354              |
| [36]      | <u>Pd-Co/N-rGO</u>                           | Pt/C    | <u>Nafion 117</u>          | 1.0 M NaBH <sub>4</sub> +<br>2.0 M NaOH | 2 M H <sub>2</sub> O <sub>2</sub> +0.5 M<br>H <sub>2</sub> SO <sub>4</sub>    | 333    | 1.9    | 275              |
| [41]      | <u>Au-NP@rGO</u>                             | Pd/C    | <u>Nafion 117</u>          | 0.4 M NaBH <sub>4</sub> +<br>2.0 M NaOH | 0.8 M H <sub>2</sub> O <sub>2</sub> +2 M<br>H <sub>2</sub> SO <sub>4</sub>    | 343    | 1.63   | 60               |
| [49]      | <u>PdAuNi/C</u>                              | Pt      | <u>Nafion 117</u>          | 1.0 M NaBH <sub>4</sub> +<br>4.0 M NaOH | 5 M H <sub>2</sub> O <sub>2</sub> +1.5 M<br>HCl                               | 348    | 1.9    | 175              |
| [50]      | <u>C<sub>Ni</sub>-S<sub>Pt</sub>/rGO</u>     | Pt/C    | <u>Nafion</u>              | 1.0 M NaBH <sub>4</sub> +<br>2.0 M NaOH | 2 M H <sub>2</sub> O <sub>2</sub> +0.5 M<br>H <sub>2</sub> SO <sub>4</sub>    | 333    | 1.9    | 234              |
| [51]      | <u>Ni<sub>ED</sub>/eNFT</u>                  | Pt/C    | Bipolar<br>interface (175) | 1.5 M NaBH <sub>4</sub> +<br>3.0 M KOH  | 15 wt% H <sub>2</sub> O <sub>2</sub> +1.5 M<br>H <sub>2</sub> SO <sub>4</sub> | 343    | 2.0    | 446              |
| This work | <u>Ni<sub>0.889</sub>-Co<sub>0.111</sub></u> | Pt/C    | <u>Nafion 117</u>          | 1.5 M NaBH <sub>4</sub> +<br>3 M NaOH   | 1.5 M H <sub>2</sub> O <sub>2</sub> +2 M<br>H <sub>2</sub> SO <sub>4</sub>    | 343    | 1.87   | 490              |
| This work | Pt/C                                         | Pt/C    | <u>Nafion 117</u>          | 1.5 M NaBH <sub>4</sub> +<br>3 M NaOH   | 1.5 M H <sub>2</sub> O <sub>2</sub> +2 M<br>H <sub>2</sub> SO <sub>4</sub>    | 343    | 1.79   | 178              |
| This work | Ni                                           | Pt/C    | <u>Nafion 117</u>          | 1.5 M NaBH <sub>4</sub> +<br>3 M NaOH   | 1.5 M H <sub>2</sub> O <sub>2</sub> +2 M<br>H <sub>2</sub> SO <sub>4</sub>    | 343    | 1.76   | 265              |
