# Supplementary material for: Succulent-plant-like Ni–Co alloy efficient catalysts for direct borohydride fuel cells
Source: Royal Society of Chemistry journal article supplement (doi:10.1039/d2dt03656h), 2023-01-01
Supplement: d2dt03656h3.pdf [file d2dt03656h3.pdf]

| Ref.      | Anode                                    | Cathode        | Separator                  | Anolyte                                 | Catholyte                                                                     | T(K) | OCV(V) | $P(\text{mW cm}^{-2})$ |
|-----------|------------------------------------------|----------------|----------------------------|-----------------------------------------|-------------------------------------------------------------------------------|------|--------|------------------------|
| [4]       | <u>NiMoN@NC</u>                          | <u>FeN-HPC</u> | non                        | 1.0 M NaBH <sub>4</sub> +<br>3.0 M NaOH | O <sub>2</sub>                                                                | 333  | 2.0    | 112                    |
| [36]      | <u>Pd-Ni/N-rGO</u>                       | Pt/C           | <u>Nafion 117</u>          | 1.0 M NaBH <sub>4</sub> +<br>2.0 M NaOH | 2 M H <sub>2</sub> O <sub>2</sub> +0.5 M<br>H <sub>2</sub> SO <sub>4</sub>    | 333  | 2.0    | 354                    |
| [36]      | <u>Pd-Co/N-rGO</u>                       | Pt/C           | <u>Nafion 117</u>          | 1.0 M NaBH <sub>4</sub> +<br>2.0 M NaOH | 2 M H <sub>2</sub> O <sub>2</sub> +0.5 M<br>H <sub>2</sub> SO <sub>4</sub>    | 333  | 1.9    | 275                    |
| [41]      | <u>Au-NP@rGO</u>                         | Pd/C           | <u>Nafion 117</u>          | 0.4 M NaBH <sub>4</sub> +<br>2.0 M NaOH | 0.8 M H <sub>2</sub> O <sub>2</sub> +2 M<br>H <sub>2</sub> SO <sub>4</sub>    | 343  | 1.63   | 60                     |
| [49]      | <u>PdAuNi/C</u>                          | Pt             | <u>Nafion 117</u>          | 1.0 M NaBH <sub>4</sub> +<br>4.0 M NaOH | 5 M H <sub>2</sub> O <sub>2</sub> +1.5 M<br>HCl                               | 348  | 1.9    | 175                    |
| [50]      | <u>C<sub>Ni</sub>-S<sub>Pt</sub>/rGO</u> | Pt/C           | <u>Nafion</u>              | 1.0 M NaBH <sub>4</sub> +<br>2.0 M NaOH | 2 M H <sub>2</sub> O <sub>2</sub> +0.5 M<br>H <sub>2</sub> SO <sub>4</sub>    | 333  | 1.9    | 234                    |
| [51]      | <u>Ni<sub>ED</sub>/eNFT</u>              | Pt/C           | Bipolar<br>interface (175) | 1.5 M NaBH <sub>4</sub> +<br>3.0 M KOH  | 15 wt% H <sub>2</sub> O <sub>2</sub> +1.5 M<br>H <sub>2</sub> SO <sub>4</sub> | 343  | 2.0    | 446                    |
| This work | Ni <sub>0.889</sub> -Co <sub>0.111</sub> | Pt/C           | <u>Nafion 117</u>          | 1.5 M NaBH <sub>4</sub> +<br>3 M NaOH   | 1.5 M H <sub>2</sub> O <sub>2</sub> +2 M<br>H <sub>2</sub> SO <sub>4</sub>    | 343  | 1.87   | 490                    |
| This work | Pt/C                                     | Pt/C           | <u>Nafion 117</u>          | 1.5 M NaBH <sub>4</sub> +<br>3 M NaOH   | 1.5 M H <sub>2</sub> O <sub>2</sub> +2 M<br>H <sub>2</sub> SO <sub>4</sub>    | 343  | 1.79   | 178                    |
| This work | Ni                                       | Pt/C           | <u>Nafion 117</u>          | 1.5 M NaBH <sub>4</sub> +<br>3 M NaOH   | 1.5 M H <sub>2</sub> O <sub>2</sub> +2 M<br>H <sub>2</sub> SO <sub>4</sub>    | 343  | 1.76   | 265                    |
